# Supplementary material
Source: PubMed Central journal article supplement (PMC4567656)
Supplement: IAI.00415-15_zii999091401so1.pdf [file IAI.00415-15_zii999091401so1.pdf]

1 **Supplementary Materials and Methods**

2 **Mice, and host cell and parasite cultures**

3 Type I IFN receptor KO mice in the C57BL/6 background (B6.129S2-  
4 *Ifnar1<sup>tm1Agt</sup>/Mmjax*) (83) were purchased from the Mutant Mouse Regional Resource  
5 Centers (MMRRC) (Bar Harbor, Maine). All animals were housed and maintained  
6 according to the McGill University Animal Care Committee (permit AUC #5380). Hind  
7 leg bones from  $\text{TNF}\alpha^{-/-}$  mice in the C57BL/6 background were used to generate bone  
8 marrow-derived pAPCs ( $\text{TNF}\alpha^{-/-}$  mice were a kind gift from Jörg Fritz (McGill  
9 University)). BMM $\Phi$  and BMDCs were generated as described above.

10

11 **Supplementary Results**

12 **II induction in infected BMM $\Phi$  occurs in the absence of endogenous production of**  
13 **TNF $\alpha$  and type I IFNs.**

14         Considering that induction of CD74 expression occurred in cultures without  
15 exogenously-added IFN $\gamma$ , we verified whether endogenous secretion of TNF $\alpha$  or type I  
16 IFNs ( $\alpha$  and  $\beta$ ), occurred in infected cells, which may trigger transcription of class-II  
17 genes through different signaling pathways (84, 85). BMM $\Phi$  from TNF $\alpha$  and type I IFN  
18 receptor (IFN-AR1) KO mice were cultured and infected with *T. gondii*, and CD74  
19 expression within these cells was analyzed by flow cytometry (Fig. S3). Infected KO  
20 cells displayed enhanced levels of CD74, arguing that the production of these cytokines  
21 is not necessary for the over expression of CD74 within infected cells.

22

23 **Supplementary Figures and Tables**

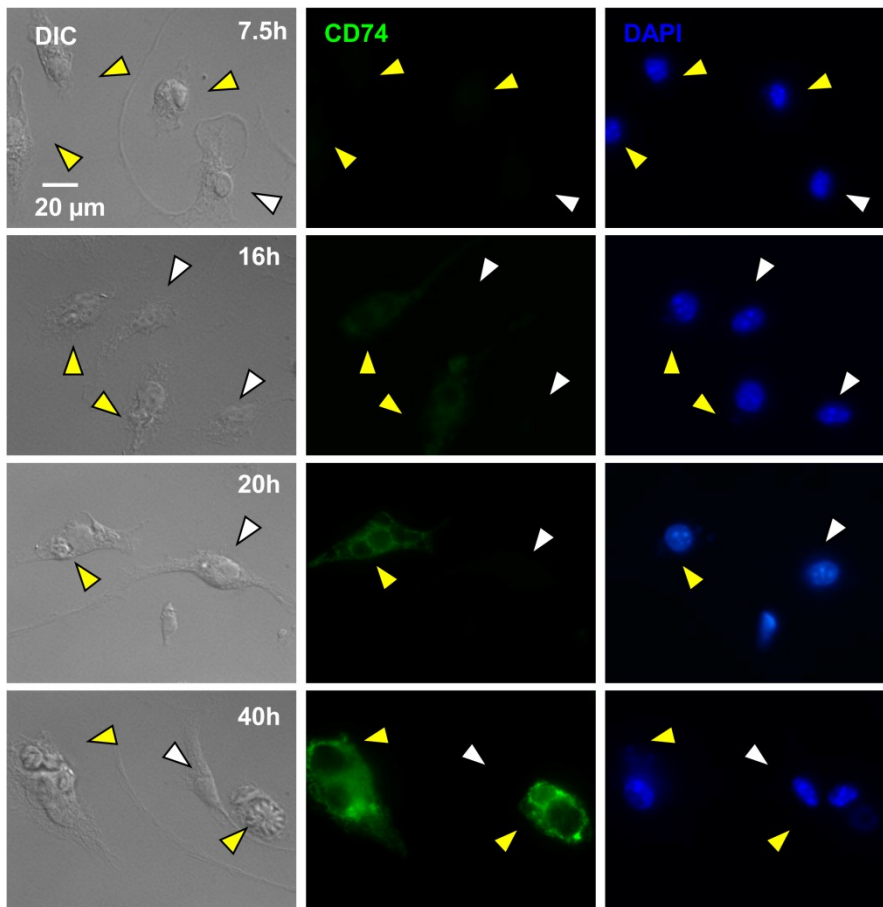

24  
25 **Fig. S1 *T. gondii* up-regulates CD74 protein expression in infected BMMΦ in the**  
26 **absence of IFN $\gamma$  until egress of the parasite.**

27 BMMΦ cultures were infected with *T. gondii* RH WT tachyzoites at an MOI 2:1,  
28 left unstimulated, and fixed with 3.7% PFA in PBS at the indicated times. Cells were  
29 stained for CD74 (here shown in green) and DAPI. Samples were visualized by  
30 epifluorescence microscopy, and images were deconvolved using AutoQuant X  
31 software. CD74 expression levels are shown in uninfected cells (white arrowheads) and  
32 infected cells (yellow arrowheads) within same fields. These fields are representative of

33 entire cultures and of three independent experiments. DIC refers to transmitted light  
34 differential interference contrast.

35

**A**

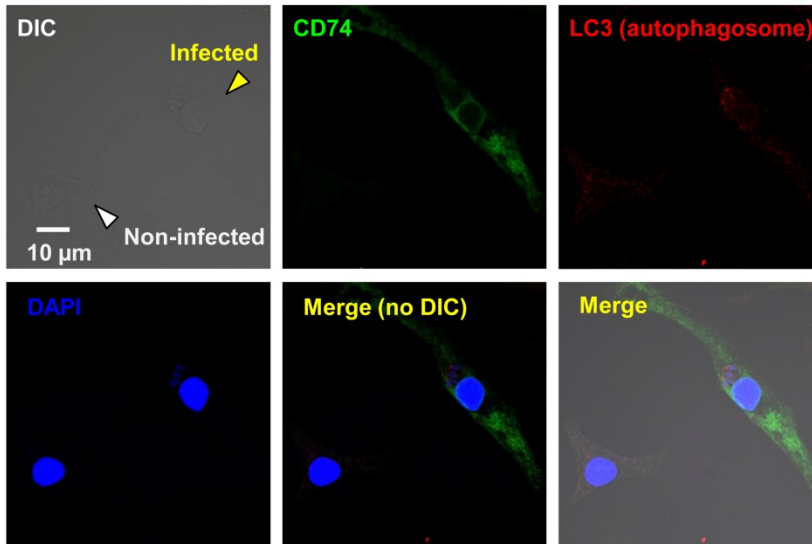

**B**

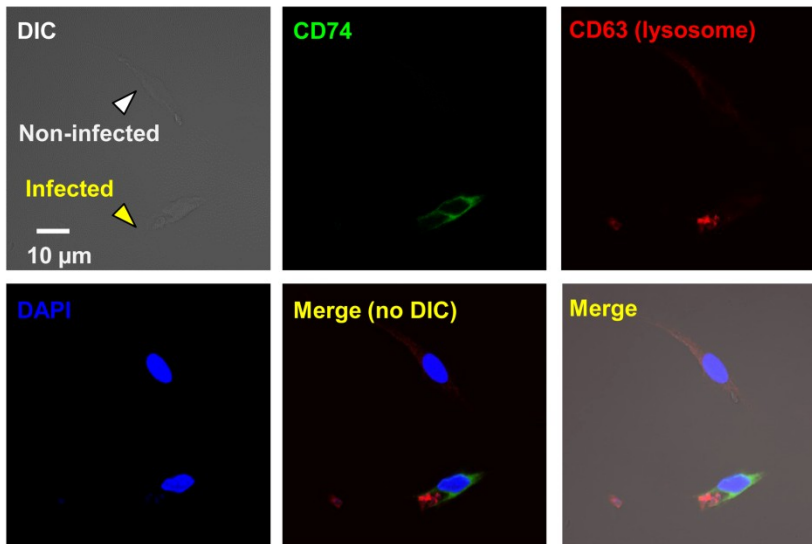

36

37 **Fig. S2 CD74 does not colocalize with autophagosome or lysosome markers in**  
38 **infected unstimulated BMMΦ.**

39 BMM $\Phi$  cultures were infected with *T. gondii* RH WT tachyzoites at an MOI 2:1,  
 40 and after 4 h, extracellular parasites were rinsed away, fresh medium was added, and  
 41 cells were fixed with 3.7% PFA in PBS after 20 h. Cells were stained for CD74 and  
 42 DAPI. Colocalization experiments for CD74 (in green) were carried with different  
 43 markers (A) for autophagosomes (LC3) and (B) lysosomes (CD63) (all shown in red).  
 44 CD74 proteins are detected in infected cells (yellow arrowheads), but not uninfected  
 45 cells (white arrowheads), and do not colocalize with LC3 ( $R_{\text{coloc}} = 0.03$ ,  $tM = 0.42$ ) nor  
 46 CD63 ( $R_{\text{coloc}} = 0.05$ ,  $tM = 0.36$ ). These fields are representative of entire cultures and of  
 47 two independent experiments. DIC refers to transmitted light differential interference  
 48 contrast.

49

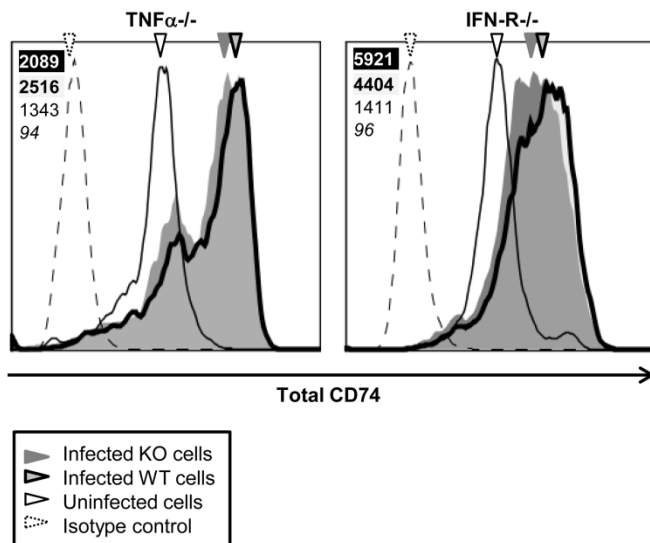

50

51 **Fig. S3 CD74 induction in infected BMM $\Phi$  occurs in the absence of endogenous**  
 52 **production of  $TNF\alpha$  and type I IFNs.**

53

54

WT,  $TNF\alpha^{-/-}$ , and  $IFN-R^{-/-}$  BMM $\Phi$  cultures were infected with CellTrace Far Red  
 DDAO-stained *T. gondii* RH tachyzoites at an of MOI 3:1, and after 4 h, extracellular

55 parasites were rinsed away, fresh medium was added, and incubated 20 h. WT  
 56 uninfected control cultures (thin curves, white arrowheads) and infected cells (bold line  
 57 shaded curves, gray arrowheads with black contour) are shown as a reference for the  
 58 KO cells (filled gray curves, gray arrowheads without contour). All cultures were stained  
 59 for CD74 after permeabilization and analyzed by flow cytometry. Isotype control is  
 60 indicated by the dashed curve and dashed arrowheads. Mean fluorescence intensity  
 61 (MFI) values are indicated for each population (i.e. italicized for isotype control,  
 62 standard font for uninfected control cells, bold font for infected WT cells, and white font  
 63 in dark box for infected KO cells). Shown here are the results form one representative  
 64 experiment from two independent experiments.  
 65

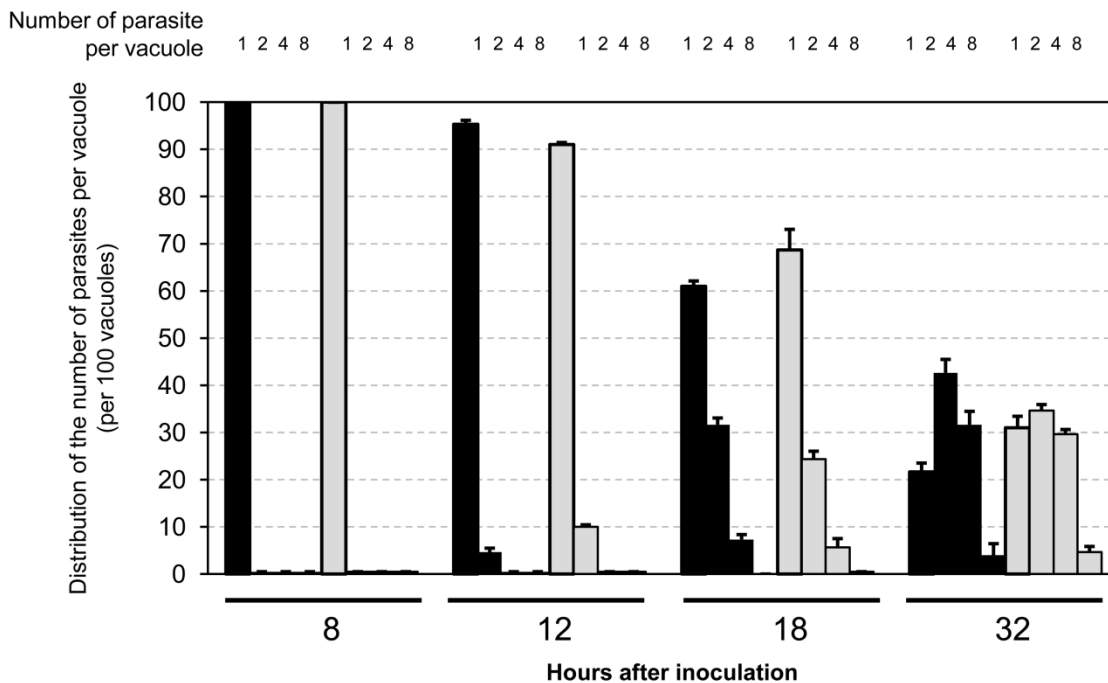

66  
 67 **Fig. S4** *In vitro* replication rate of parasites in infected BMM $\Phi$  is not affected by  
 68 the presence or absence of CD74.

69 WT and CD74<sup>-/-</sup> BMMΦ cultures were plated on glass coverslips, infected with  
 70 RH WT parasites at an MOI of 3:1, and fixed with 3.7% PFA at the indicated times after  
 71 inoculation (8, 12, 18, and 32 h post-inoculation). The number of parasites per vacuole  
 72 was counted in 100 randomly selected vacuoles for each type point in two different  
 73 cover slips. Each bar represents the number of vacuoles containing the indicated  
 74 number of parasites (1, 2, 4, or 8) within WT BMMΦ (black bars) and CD74<sup>-/-</sup> BMMΦ  
 75 (grey bars). Shown here are the results form one representative experiment from two  
 76 independent experiments.

77

78 **Table S1 PCR primers for mouse genotyping.**

| Primer type   | Gene                               |                                     |
|---------------|------------------------------------|-------------------------------------|
|               | li (CD74)                          | H2-DM                               |
| <b>WT</b>     | 5'- AAT CAG CGC TCA CT -3'         | 5'- CAC ATT CCG GCA CAC -3'         |
| <b>Common</b> | 5'- GGC TAG GTC CCA GTG TAG GC -3' | 5'- TCT GGA CAC TGG GAT TTG -3'     |
| <b>Mutant</b> | 5'- CGC TGA CAG CCG GAA CAC GG -3' | 5'- CCT TCT ATC GCC TTC TTG ACG -3' |

79

80 **Table S2 RT-PCR primers for class CD74 genes.**

| Gene             | Sense primer                           | Anti-sense primer                     |
|------------------|----------------------------------------|---------------------------------------|
| <b>li p31</b>    | 5'-ACC GAG GCT CCA CCT AAA GAG-3'      | 5'- TTG ACC CAG TTC CTG CCT G-3'      |
| <b>li p41</b>    | 5'-TTC CTC ACA CCA AGA GCC G -3'       | 5'- TGT CCA GTG GCT CAC TGC AG -3'    |
| <b>li common</b> | 5'- GAA CCT GCA ACT GGA GAG CC -3'     | 5'- GGT TTG GCA GAT TTC GGA AG -3'    |
| <b>H2-Aα</b>     | 5'- CAT CTT CCC TCC TGT GAT CAA CA -3' | 5'- CAC CGT CTG CGA CTG ACT TG -3'    |
| <b>H2-Aβ1</b>    | 5'- GGA GAC TCC GAA AGG CAT TTC -3'    | 5'- GCG TCC CGT TGG TGA AGT AG -3'    |
| <b>H2-Eβ1</b>    | 5'- TGG CAG CTG TGA TCC TGT TG -3'     | 5'- AAA CCA TGG TCT GGA GTC TCT GA-3' |
| <b>H2-DMα</b>    | 5'- GGC GGT GCT CGA AGC A -3'          | 5'- TGT GCC GGA ATG TGT GGT T -3'     |
| <b>H2-DMβ1/2</b> | 5'- CTA TCC AGC GGA TGT GAC CAT -3'    | 5'- TGG GCT GAG CCG TCT TCT -3'       |

81
